# Supplementary material
Source: Springer Nature journal article supplement (https://www.springermedizin.de/resource/supplementary/12865_2010_328_MOESM13_ESM.pdf/9427764)

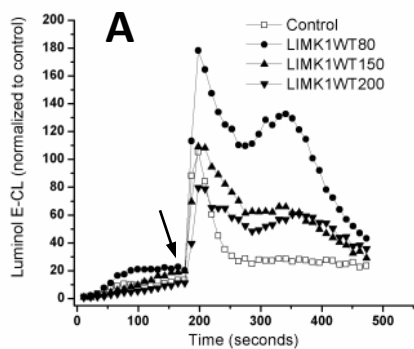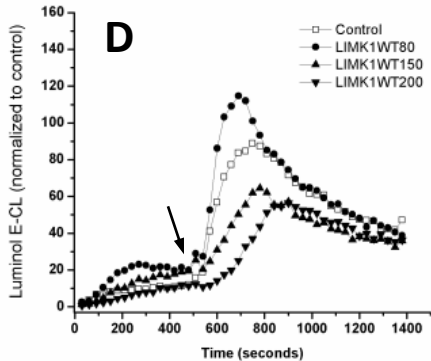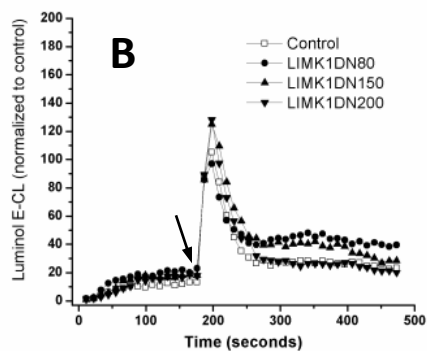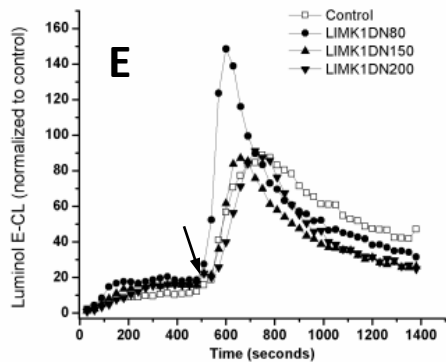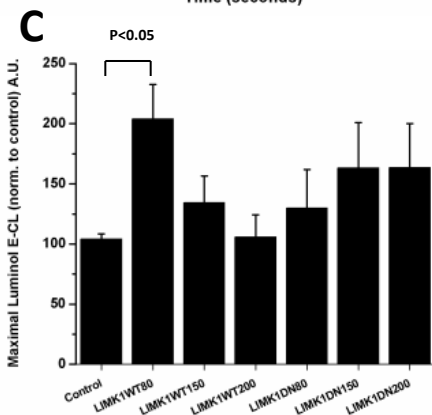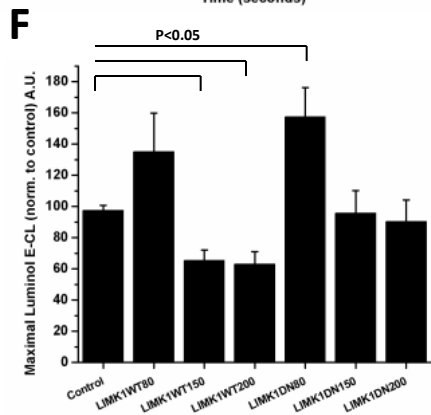

**FMLP**

**PMA**

Supplement: MOESM13 [file 9427764]
